# Supplementary material for: Non-FG mediated transport of the large pre-ribosomal subunit through the nuclear pore complex by the mRNA export factor Gle2
Source: PubMed Central journal article supplement (PMC3783196; doi:10.1093/nar/gkt675), 2013-07-31
Supplement: supp_gkt675_nar-01029-v-2013-File010.pdf [file supp_gkt675_nar-01029-v-2013-File010.pdf]

## Supplementary Data

### Non-FG mediated transport of the large pre-ribosomal subunit through the nuclear pore complex by the mRNA export factor Gle2

Laura Occhipinti, Yiming Chang, Martin Altvater, Anna Maria Menet, Stefan Kemmler and Vikram Govind Panse

#### Content:

**Supplementary Figure S1:** NPC distribution and localization of pre-40S subunits and mRNA remain unaltered in *gle2* mutant strains.

**Supplementary Figure S2:** Localization of pre-ribosomal subunits and NPC distribution remain unaltered in *gle2-1*, *gle2-patch* and *gle2-gis* mutant strains under mild ethanol stress.

**Supplementary Table S1:** Yeast strains used in this study.

**Supplementary Table S2:** Plasmids used in this study.

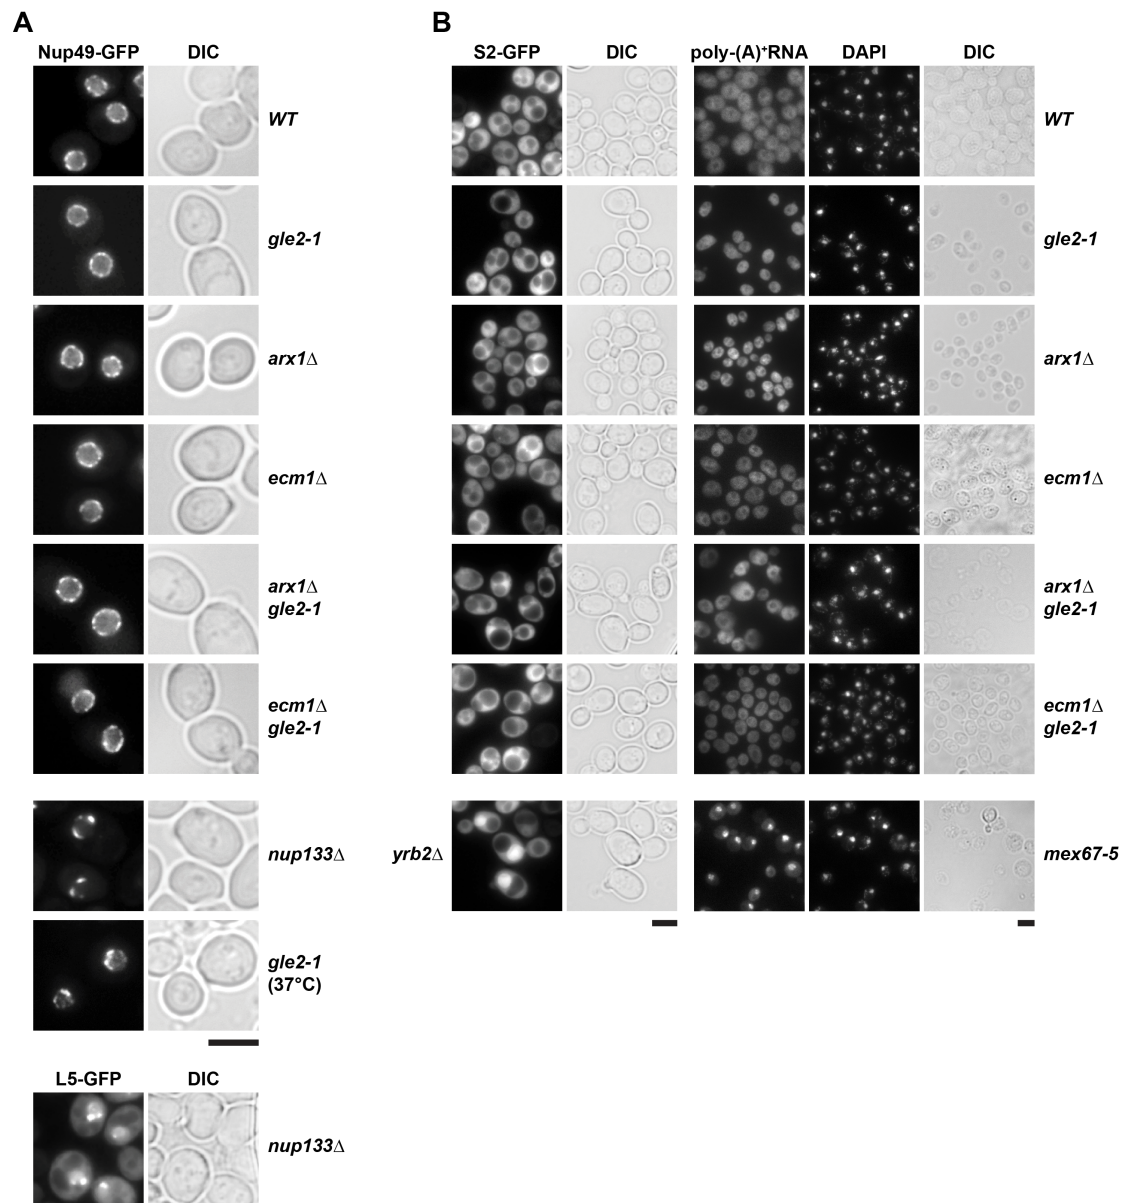

**Supplementary Figure S1: NPC distribution and localization of pre-40S subunits and mRNA remain unaltered in *gle2* mutant strains.** (A) Indicated strains containing Nup49-GFP were grown at 30°C till mid log phase, and localization of Nup49-GFP was analyzed by fluorescence microscopy. The *gle2-1* (shifted to 37°C for 5 h) and *nup133*Δ (at 30°C) mutants served as positive controls for “pore-clustering” phenotype. To show nuclear accumulation of pre-60S subunits in the “pore-clustering” *nup133*Δ strain, cells containing L5-GFP reporter were grown at 30°C till mid log phase and analyzed by fluorescence microscopy. (B) Indicated strains containing S2-GFP reporters (left) or no reporter (right) were grown at 30°C till mid log phase. Localization of S2-GFP was monitored by fluorescence microscopy.

The *yrb2* $\Delta$  strain served as positive control for impaired nuclear export of pre-40S subunits. Localization of poly-(A)<sup>+</sup> RNA in the indicated strains was assessed by FISH using a Cy3-oligo(dT)<sup>30</sup> probe. Nuclear and mitochondrial DNA was stained with DAPI. The *mex67-5* mutant, grown at 30°C till mid log phase and shifted to 37°C for 1 h, served as positive control for impaired export of poly-(A)<sup>+</sup> RNA. Scale bar = 5  $\mu$ m.

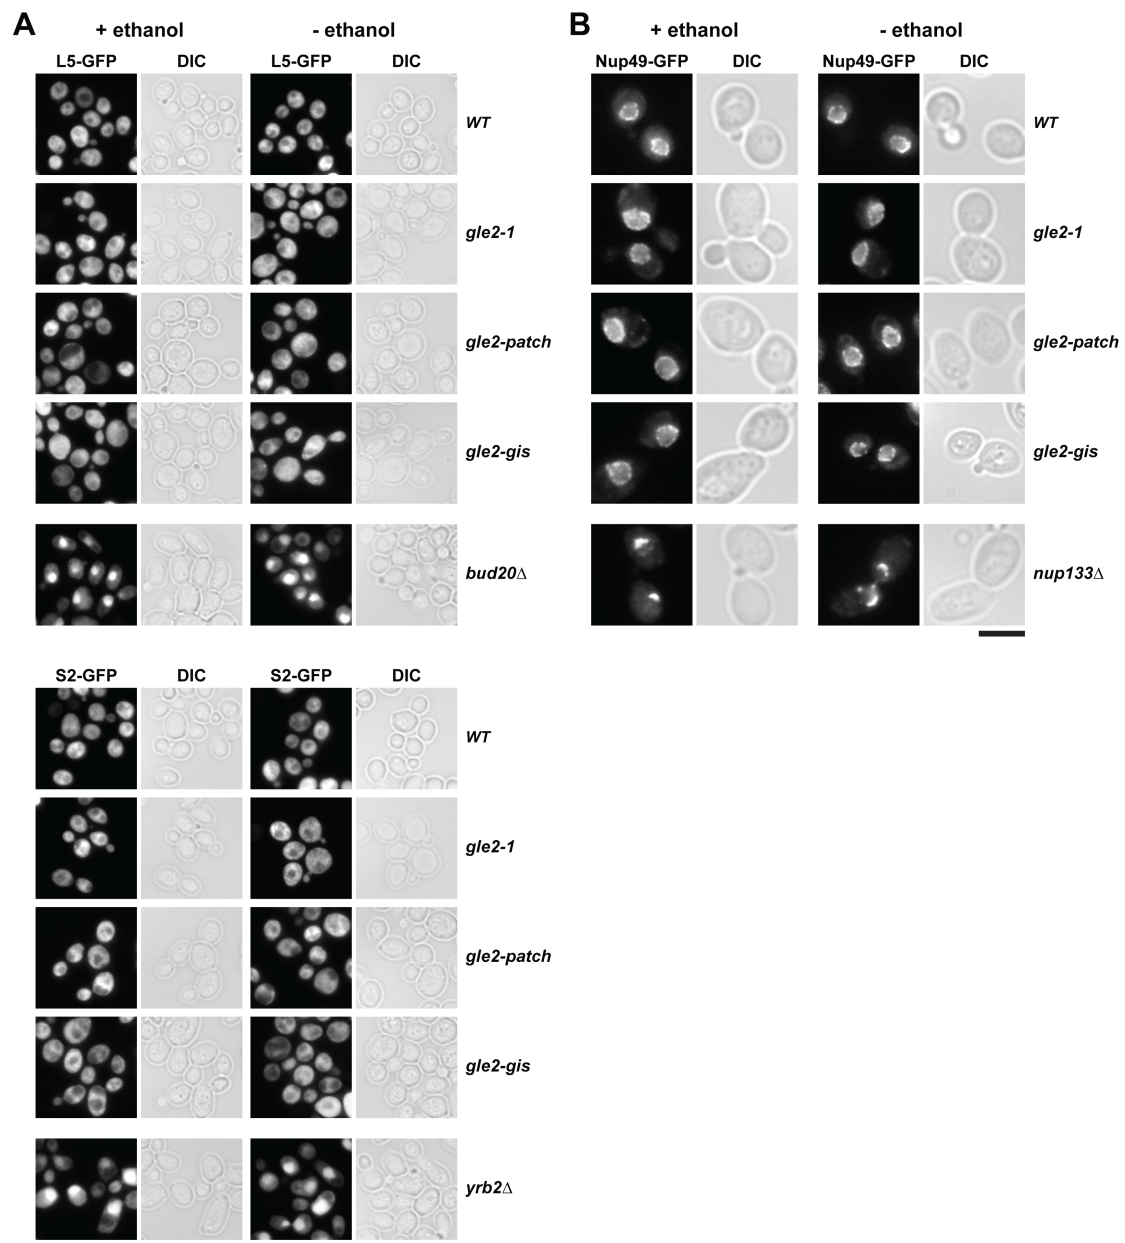

**Supplementary Figure S2: Localization of pre-ribosomal subunits and NPC distribution remain unaltered in *gle2-1*, *gle2-patch* and *gle2-gis* mutant strains under mild ethanol stress.** The indicated strains containing L5-GFP or S2-GFP reporter (A) or Nup49-GFP (B) were grown at 30°C till mid log phase and treated with or without 5% ethanol (v/v) for 5 min. After fixation with 4% formaldehyde (w/v), localization of GFP proteins was analyzed by fluorescence microscopy. *bud20Δ* (for impaired pre-60S export), *yrb2Δ* (for impaired pre-40S export) and *nup133Δ* mutant strains (for “pore-clustering” phenotype) served as positive controls. Scale bar = 5 μm.

**Supplementary Table S1: Yeast strains used in this study.**

| <b>Strain</b>                         | <b>Genotype</b>                                                                                    | <b>Source</b>   |
|---------------------------------------|----------------------------------------------------------------------------------------------------|-----------------|
| BY4741                                | <i>MATa ura3 his3 leu2 met15 TRP1</i>                                                              | Open Biosystems |
| <i>gle2-1</i>                         | <i>MAT<math>\alpha</math> gle2-1 ade2-1 ADE3 ura3-1 his3-11,15 leu2-3,112 trp1-1 LYS2 can1-100</i> | (24)            |
| <i>xpo1</i> shuffle<br><i>gle2-1</i>  | <i>MAT<math>\alpha</math> ura3 his3 leu2 xpo1::KANMX6 gle2-1</i><br><pRS316-XPO1>                  | This study      |
| <i>mtr2</i> shuffle<br><i>gle2-1</i>  | <i>MAT<math>\alpha</math> ura3 leu2 trp1 mtr2::HIS3MX gle2-1</i><br><pRS316-MTR2>                  | This study      |
| <i>mex67</i> shuffle<br><i>gle2-1</i> | <i>MAT<math>\alpha</math> ura3 leu2 trp1 mex67::HIS3MX gle2-1</i><br><pRS316-MEX67>                | This study      |
| <i>bud20</i> $\Delta$ <i>gle2-1</i>   | <i>MAT<math>\alpha</math> gle2-1 ura3 his3 leu3 trp1</i><br><i>bud20::NATMX4</i>                   | This study      |
| <i>ecm1</i> $\Delta$ <i>gle2-1</i>    | <i>MATa ura3 his3 leu2 ECM1::KANMX6 gle2-1</i>                                                     | This study      |
| <i>arx1</i> $\Delta$ <i>gle2-1</i>    | <i>MATa ura3 his3 leu2 trp1 ARX1::KANMX6 gle2-1</i>                                                | This study      |
| <i>nog1</i> shuffle<br><i>gle2-1</i>  | <i>MATa ura3 his3 leu2 nog1::KANMX6 gle2-1</i><br><pRS316-NOG1>                                    | This study      |
| <i>nop7</i> shuffle<br><i>gle2-1</i>  | <i>MATa ura3 his3 leu2 trp1 nop7::KANMX6 gle2-1</i><br><pRS316-NOP7>                               | This study      |
| Ssf1-TAP                              | <i>MAT<math>\alpha</math> his3 leu2 ura3 SSF1-TAP::TRP1</i>                                        | (54)            |
| Rix1-TAP                              | <i>MAT<math>\alpha</math> ura3 his3 leu2 trp1 RIX1-TAP::TRP1</i>                                   | (54)            |
| Arx1-TAP                              | <i>MAT<math>\alpha</math> ura3 his3 leu2 ARX1-TAP::TRP1</i>                                        | (54)            |
| Nmd3-TAP                              | <i>MATa his3 leu2 ura3 NMD3-TAP::HIS3MX6</i>                                                       | Open Biosystems |
| Kre35-TAP                             | <i>MAT<math>\alpha</math> ura3 his3 leu2 trp1 KRE35-TAP::TRP1</i>                                  | (54)            |
| Arx1-TAP <i>gle2</i> $\Delta$         | <i>MATa his3 leu2 ura3 Arx1-TAP::KANMX6 gle2::</i><br><i>NATMX4</i>                                | This study      |
| <i>nup116</i> $\Delta$                | <i>MATa his3 leu2 trp1 ura3 nup116::HIS3</i>                                                       | (27)            |
| Arx1-TAP<br><i>nup116</i> $\Delta$    | <i>MATa his3 leu2 ura3 nup116::HIS3 ARX1-</i><br><i>TAP::TRP</i>                                   | This study      |

|                                        |                                                                                             |                 |
|----------------------------------------|---------------------------------------------------------------------------------------------|-----------------|
| Nup100-TAP                             | <i>MAT<sub>a</sub> his3 leu2 ura3 Nup100-TAP::HIS3MX6</i>                                   | Open Biosystems |
| Nup116-TAP                             | <i>MAT<sub>α</sub> his3 leu2 ura3 Nup116-TAP::HIS3MX6</i>                                   | (27)            |
| Nup116-TAP<br><i>gle2Δ</i>             | <i>MAT<sub>α</sub> his3 leu2 ura3 Nup116-TAP::HIS3MX6<br/>gle2::NATMX4</i>                  | This study      |
| <i>arx1Δ</i>                           | <i>MAT<sub>a</sub> ura3 his3 leu2 arx1::KANMX6</i>                                          | Open Biosystems |
| <i>ecm1Δ</i>                           | <i>MAT<sub>a</sub> ura3 his3 leu2 met15 ecm1::KANMX6</i>                                    | Open Biosystems |
| <i>nmd3</i> shuffle<br><i>gle2-1</i>   | <i>MAT<sub>α</sub> ura3 leu2 trp1 nmd3::HIS3MX gle2-1<br/>&lt;pRS316-NMD3&gt;</i>           | This study      |
| <i>npl3Δ gle2-1</i>                    | <i>MAT<sub>α</sub> gle2-1 ura3-1 his3 leu2, trp1<br/>npl3::KANMX6</i>                       | This study      |
| <i>yrb2Δ</i>                           | <i>MAT<sub>a</sub> his3 leu2 ura3 yrb2::KANMX6</i>                                          | Open Biosystems |
| <i>mex67</i> shuffle                   | <i>MAT<sub>α</sub> ura3 leu2 trp1 mex67::HIS3MX &lt;pRS316-MEX67&gt;</i>                    | This study      |
| <i>nup133Δ</i>                         | <i>MAT<sub>a</sub> his3 leu2 ura3 nup133::KANMX6</i>                                        | Open Biosystems |
| <i>gle2Δ</i>                           | <i>MAT<sub>a</sub> ura3 his3 leu2 gle2::KANMX6</i>                                          | This study      |
| <i>mex67</i> shuffle<br><i>nup116Δ</i> | <i>MAT<sub>α</sub> ura3 leu2 trp1 nup116::NATMX4<br/>mex67::HIS3MX &lt;pRS316-MEX67&gt;</i> | This study      |
| <i>mtr2</i> shuffle<br><i>nup116Δ</i>  | <i>MAT<sub>a</sub> ura3 leu2 trp1 nup116::NATMX4<br/>mtr2::HIS3MX &lt;pRS316-MTR2&gt;</i>   | This study      |
| <i>nmd3</i> shuffle<br><i>nup116Δ</i>  | <i>MAT<sub>a</sub> ura3 leu2 trp1 nup116::NATMX4<br/>nmd3::HIS3MX &lt;pRS316-NMD3&gt;</i>   | This study      |
| <i>xpo1</i> shuffle<br><i>nup116Δ</i>  | <i>MAT<sub>a</sub> ura3 leu2 his3 nup116::NATMX4<br/>xpo1::KANMX6 &lt;pRS316-XPO1&gt;</i>   | This study      |
| <i>Pgal-NUP116</i><br><i>arx1Δ</i>     | <i>MAT<sub>a</sub> ura3 his3 leu2 met15 arx1::KANMX6 Pgal-NUP116::NATMX4</i>                | This study      |
| <i>Pgal-NUP116</i><br><i>ecm1Δ</i>     | <i>MAT<sub>a</sub> ura3 his3 leu2 met15 ecm1::KANMX6<br/>Pgal-NUP116::NATMX4</i>            | This study      |

**Supplementary Table S2: Plasmids used in this study.**

| <b>Plasmid</b>                    | <b>Relevant markers</b>            | <b>Source</b> |
|-----------------------------------|------------------------------------|---------------|
| pRS314-NMD3                       | <i>NMD3 CEN TRP1</i>               | (54)          |
| pRS314- <i>nmd3</i> Δ <i>NES1</i> | <i>nmd3</i> Δ <i>NES1 CEN TRP1</i> | (54)          |
| pRS315-XPO1                       | <i>XPO1 CEN LEU2</i>               | (12)          |
| pRS315- <i>xpo1-1</i>             | <i>xpo1-1 CEN LEU2</i>             | (12)          |
| pRS314-MTR2                       | <i>MTR2 CEN TRP1</i>               | (54)          |
| pRS314- <i>mtr2-33</i>            | <i>mtr2-33 CEN TRP1</i>            | (54)          |
| pUN100-MEX67                      | <i>MEX67 CEN TRP1</i>              | (54)          |
| pRS315- <i>mex67kraa</i>          | <i>mex67kraa CEN TRP1</i>          | (54)          |
| pRS315- <i>mex67-5</i>            | <i>mex67-5 CEN LEU2</i>            | (12)          |
| pRS313-ECM1                       | <i>ECM1 CEN HIS3</i>               | This study    |
| pRS313-ARX1                       | <i>ARX1 CEN HIS3</i>               | This study    |
| pRS315-NOP7                       | <i>NOP7 CEN LEU2</i>               | This study    |
| pRS315- <i>nop7-1</i>             | <i>nop7-1 CEN LEU2</i>             | (51)          |
| pRS315- <i>nog1</i>               | <i>NOG1 CEN LEU2</i>               | This study    |
| pRS315- <i>nog1-11</i>            | <i>nog1-11 CEN LEU2</i>            | (52)          |
| pRS315- <i>gle2-R186E,K305E</i>   | <i>gle2-R186E,K305E CEN LEU2</i>   | This study    |
| pRS315- <i>gle2-R168E,R212E</i>   | <i>gle2-R168E,R212E CEN LEU2</i>   | This study    |
| pRS313-GLE2                       | <i>GLE2 CEN HIS3</i>               | This study    |
| pRS314-GLE2                       | <i>GLE2 CEN TRP1</i>               | This study    |
| pRS315-GLE2                       | <i>GLE2 CEN LEU2</i>               | (24)          |
| pRS316-GLE2                       | <i>GLE2 CEN URA3</i>               | This study    |
| pRS315-NUP116                     | <i>NUP116 CEN LEU2</i>             | This study    |
| pRS315- <i>nup116-E154,155R</i>   | <i>nup116-E154,155R CEN LEU2</i>   | This study    |
| pUN100-NUP49-GFP                  | <i>NUP49-GFP CEN LEU2</i>          | This study    |

|                       |                           |            |
|-----------------------|---------------------------|------------|
| pRS316- <i>NUP116</i> | <i>NUP116 CEN URA3</i>    | This study |
| pRS315-S2-eGFP        | <i>RPS2-eGFP CEN LEU2</i> | (18)       |
| pRS315-L5-eGFP        | <i>RPL5-eGFP CEN LEU2</i> | (18)       |
| pRS316-S2-eGFP        | <i>RPS2-eGFP CEN URA3</i> | (67)       |
| pRS316-L5-eGFP        | <i>RPL5-eGFP CEN URA3</i> | (18)       |



## References for Supplementary Data

67. Milkereit, P., Strauss, D., Bassler, J., Gadal, O., Kühn, H., Schütz, S., Gas, N., Lechner, J., Hurt, E. and Tschochner, H. (2003) A Noc complex specifically involved in the formation and nuclear export of ribosomal 40 S subunits. *J. Biol. Chem.*, **278**, 4072-4081.
